# Supplementary material for: Causation or only correlation? Application of causal inference graphs for evaluating causality in nano-QSAR models
Source: Royal Society of Chemistry journal article supplement (doi:10.1039/c5nr08279j), 2016-01-01
Supplement: c5nr08279j1.pdf [file c5nr08279j1.pdf]

## Electronic Supplementary Information

### **Causation or only correlation? Application of causal inference graphs for evaluating causality in nano-QSAR models**

Natalia Sizochenko,<sup>a,b</sup> Agnieszka Gajewicz,<sup>a</sup> Jerzy Leszczynski,<sup>b</sup> TomaszPuzyn<sup>\*a</sup>

*<sup>a</sup>Laboratory of Environmental Chemometrics, Faculty of Chemistry, University of Gdansk, Wita Stwosza 63, 80-308, Gdansk, Poland*

*<sup>b</sup> Interdisciplinary Center for Nanotoxicity, Department of Chemistry, Jackson State University, 1400 J. R. Lynch Street, P. O. Box 17910, Jackson, MS 39217, USA*

*\*corresponding author: [t.puzyn@qsar.eu.org](mailto:t.puzyn@qsar.eu.org)*

## K-means modeling

K-means clustering is founded on the approximation of each point in a dataset by the centroid of that point's cluster. K-means clustering is an unsupervised learning algorithm. Hence, it may be an appropriate measure to estimate the similarity of nanoparticles. The results of k-means clustering in 1D space of Wigner-Seitz radius are presented in Table S1.

**Table S1.** K-means clustering

| Cluster 1          | Cluster 2                                                                 | Cluster 3                                                                                                                        | Cluster 4                                                                                                                                                            |
|--------------------|---------------------------------------------------------------------------|----------------------------------------------------------------------------------------------------------------------------------|----------------------------------------------------------------------------------------------------------------------------------------------------------------------|
| CoO, CuO, NiO, ZnO | SnO <sub>2</sub> , TiO <sub>2</sub> , ZrO <sub>2</sub> , SiO <sub>2</sub> | Al <sub>2</sub> O <sub>3</sub> , Cr <sub>2</sub> O <sub>3</sub> , Fe <sub>2</sub> O <sub>3</sub> , V <sub>2</sub> O <sub>3</sub> | Bi <sub>2</sub> O <sub>3</sub> , In <sub>2</sub> O <sub>3</sub> , La <sub>2</sub> O <sub>3</sub> ,<br>Sb <sub>2</sub> O <sub>3</sub> , Y <sub>2</sub> O <sub>3</sub> |

Cluster 1:  $r_w < 0.17$ ; highest toxicity, MeOx.

Cluster 2:  $0.17 < r_w < 0.18$ ; lowest toxicity, MeO<sub>2</sub>.

Cluster 3:  $0.18 < r_w < 0.20$ ; intermediate, Me<sub>2</sub>O<sub>3</sub>.

Cluster 4:  $r_w < 0.20$ ; intermediate, Me<sub>2</sub>O<sub>3</sub>.
